# Supplementary material
Source: Research Square preprint supplement (doi:10.21203/rs.3.rs-9125064/v1)
Supplement: Supplementary file 2 [file b1e9a7f7bc1f78151081e52b.pdf]

| Name                                                                       | LIA to 1980s | 1980s to 2000 | 2000 to 2022 | LIA to 2022 | IMBIE Subregion | LAT   | LON    |
|----------------------------------------------------------------------------|--------------|---------------|--------------|-------------|-----------------|-------|--------|
| Zachariae Isstrøm                                                          | -9,695.81    | -18,199.33    | -44,095.52   | -52,200.22  | NE              | 78.93 | -21    |
| Sermeq Kujalleq ; Sermeq Kujatdleq ; Jakobshavn Isbræ                      | -25,937.10   | -4,653.18     | -14,343.15   | -41,951.20  | CW              | 69.18 | -49.8  |
| C.H. Ostenfeld Gletsjer                                                    | -5,617.82    | 10,181.01     | -32,740.24   | -39,315.61  | NO              | 81.54 | -45.37 |
| Ningertii apusiia ; Nigertiip Apusiia ; Midgard Glacier                    | -18,644.99   | -2,694.85     | -10,369.53   | -31,709.37  | SE              | 66.44 | -36.74 |
| Sermersuaq ; Sermerssuaq ; Steenstrup Gletsjer                             | -25,875.05   | -2,408.71     | -5,805.65    | -31,232.43  | NW              | 75.32 | -57.83 |
| Petermann Gletsjer                                                         | -7,925.59    | 4,936.48      | -19,677.70   | -29,592.45  | NO              | 80.58 | -60.05 |
| Kofoed-Hansen Bræ                                                          | -21,063.22   | -5,949.70     | -1,727.76    | -26,072.26  | NE              | 77.5  | -21.87 |
| Spaltegletsjer                                                             | -14,142.76   | -5,008.54     | -15,548.59   | -24,663.75  | NE              | 79.71 | -20.29 |
| Hagen Bræ                                                                  | 571.74       | -9,134.69     | -16,195.63   | -24,039.85  | NO              | 81.45 | -27.35 |
| Rink Gletsjer                                                              | -21,176.96   | -1,177.92     | -3,021.53    | -21,872.86  | NW              | 76.22 | -61    |
| Sermeq ; Upernavik Isstrøm                                                 | -20,155.12   | -3,288.41     | -4,831.17    | -21,039.21  | NW              | 72.84 | -54.28 |
| Tuttulikassaap Sermia ; Hayes Gletsjer                                     | -17,304.14   | -2,612.68     | -2,517.38    | -20,412.05  | NW              | 74.96 | -57.04 |
| Kangiata Nunaata Sermia ; Kangiata nunata Sermia                           | -17,169.95   | -2,136.28     | -1,548.67    | -20,386.90  | SW              | 64.3  | -49.61 |
| Nunatakassaap Sermia ; Nunatakavsaup Sermia                                | -4,393.93    | -892.96       | 0            | -20,355.43  | NW              | 74.62 | -56.22 |
| Qeqertaarsuusarsuup Sermia ; Tracy Gletsjer                                | -4,195.39    | -3,509.11     | -12,756.62   | -18,452.45  | NW              | 77.66 | -65.97 |
| Tuttulipaluup Sermia ; Farquhar Gletsjer                                   | -4,195.39    | -3,509.11     | -12,756.62   | -18,452.45  | NW              | 77.7  | -66.23 |
| Nuussuup Sermia ; Kong Oscar Gletsjer                                      | -16,566.93   | -1,285.08     | -2,407.88    | -17,815.46  | NW              | 75.99 | -59.86 |
| Steensby Gletsjer                                                          | -9,958.91    | 5,444.88      | -13,196.11   | -16,354.62  | NO              | 81.38 | -54.03 |
| Sermersuaq ; Sermerssuaq ; Humboldt Gletsjer                               | -5,921.35    | -3,648.48     | -11,452.90   | -16,083.60  | NO              | 79.45 | -63.4  |
| Innaqqissorsuup Oqquani Sermeq ; Gade Gletsjer                             | -8,632.64    | -3,948.76     | -1,247.39    | -16,062.89  | NW              | 76.38 | -62.77 |
| Issuusarsuit Sermiat                                                       | -12,232.16   | -503.01       | -2,828.22    | -14,721.78  | NW              | 76.07 | -60.63 |
| Qikertat Timaani Sermeq ; Qeqertat Timaanni Sermeq ; Docker Smith Gletsjer | -9,248.07    | -2,837.43     | -6,684.52    | -14,038.80  | NW              | 76.3  | -61.77 |
| Kjer Gletsjer                                                              | -13,283.89   | -2,027.28     | -7,137.62    | -14,033.31  | NW              | 75.1  | -57.57 |
| Sortebræ                                                                   | -6,474.54    | 3,232.09      | -6,279.06    | -13,312.71  | CE              | 68.82 | -27.08 |

|                                                                                                  |            |           |            |            |    |       |        |
|--------------------------------------------------------------------------------------------------|------------|-----------|------------|------------|----|-------|--------|
| Sermersuaq ; Nunatarruup<br>Hermia ; Ullip Sermia ; Uvdlip<br>Sermerssuaq ; Harald Moltke<br>Bræ | -7,762.22  | -655.53   | -4,914.55  | -12,721.79 | NW | 76.58 | -67.63 |
| Sverdrup Gletsjer                                                                                | -4,582.14  | -449.57   | -7,390.51  | -12,291.13 | NW | 75.62 | -57.97 |
| Nordenskiold Gletsjer                                                                            | -11,677.84 | -258.27   | -5,155.50  | -12,285.04 | NW | 75.82 | -59.04 |
| Sermeq                                                                                           | -11,152.89 | -180.32   | -837.94    | -12,171.14 | SW | 60.8  | -44.49 |
| Helheim Gletsjer                                                                                 | -3,759.58  | 623.59    | -7,833.64  | -11,402.14 | SE | 66.37 | -38.31 |
| Eqalorutsit Killiit Sermiat                                                                      | -9,054.60  | -671.55   | -1,728.95  | -11,241.01 | SW | 61.28 | -46.15 |
| Nansen Gletsjer                                                                                  | -5,649.45  | -1,070.95 | -5,797.99  | -10,601.12 | NW | 75.78 | -58.83 |
| Apuseerngai ; Fenris Gletsjer                                                                    | -4,290.87  | -562.99   | -5,721.49  | -10,575.35 | SE | 66.38 | -37.54 |
| Qalerallit Sermiat ; Qaleragdlit<br>Sermiat                                                      | -5,272.18  | -3,874.83 | -2,911.24  | -10,502.63 | SW | 61.01 | -46.69 |
| Dietrichson Gletsjer                                                                             | -7,758.07  | -298.38   | -2,999.49  | -10,261.78 | NW | 75.46 | -58.06 |
| Umiammakku Sermia ;<br>Umiammakku Sermiat ;<br>Umiammakku Isbræ                                  | -6,093.85  | -429.14   | -4,039.59  | -10,209.94 | NW | 71.81 | -52.36 |
| Storstrømmen                                                                                     | -11,812.13 | 9,083.95  | -4,567.72  | -9,996.09  | NE | 77.07 | -22.77 |
| Salliarutsip Sermia ;<br>Sagdliarutsip Sermia ; Inngia<br>Isbræ                                  | -812.01    | -1,252.47 | -9,207.41  | -9,954.16  | NW | 72.04 | -52.61 |
| Morell Gletsjer                                                                                  | -5,623.28  | -630.25   | -3,908.05  | -9,932.46  | NW | 76.32 | -62.5  |
| Bredebræ                                                                                         | -11,403.94 | 9,647.01  | -4,567.72  | -8,936.98  | NE | 76.63 | -22.67 |
| Fimbulgletsjer                                                                                   | -4,974.83  | -304.23   | -3,178.47  | -8,457.54  | SE | 63.95 | -41.51 |
| Sermilik ; Sermilik Bræ                                                                          | -443.47    | -4,679.10 | -2,550.10  | -7,672.67  | SW | 60.98 | -46.99 |
| Storebjørn                                                                                       | -2,526.45  | -185.79   | -6,156.52  | -7,338.23  | SE | 63.72 | -41.65 |
| Apuseerngai ; Apuseerajik                                                                        | -2,651.06  | -1,530.97 | -3,301.85  | -7,312.92  | SE | 66.19 | -38.07 |
| Jungersen Gletsjer                                                                               | -320.2     | -4,926.06 | -2,286.92  | -7,131.50  | NO | 82.13 | -42.66 |
| Ryder Gletsjer                                                                                   | 109        | 5,023.60  | -12,554.07 | -6,913.06  | NO | 81.55 | -50.25 |
| A.P. Bernstorff Gletsjer                                                                         | -3,305.25  | -1,623.23 | -1,709.24  | -6,454.79  | SE | 63.88 | -41.77 |
| Sermeq Silarleq ; Sermeq<br>Silardleq                                                            | -838.91    | -187.44   | -5,372.85  | -6,066.72  | CW | 70.83 | -50.76 |
| Narsap Sermia ; Narssap<br>Sermia                                                                | -277.99    | -265.96   | -5,752.39  | -6,063.69  | SW | 64.67 | -49.86 |
| Sermeq ; Arsuk Bræ                                                                               | -2,318.10  | -2,703.88 | -961.35    | -5,983.32  | SW | 61.31 | -47.87 |
| Apuseer anittangasikkaaju ;<br>Apuseeq Anittangasikkaajuk ;<br>Storbræ                           | -376.54    | -3,259.82 | -2,995.02  | -5,803.84  | CE | 68.87 | -26.1  |
| Kattilersorpia ; Kaddilertsarpia ;<br>Kattilertarpia ; Kagtilersorpia                            | -4,659.77  | -476.75   | -485.24    | -5,621.76  | SE | 66.45 | -35.72 |

|                                                                                          |           |           |           |           |    |       |        |
|------------------------------------------------------------------------------------------|-----------|-----------|-----------|-----------|----|-------|--------|
| Apuseeq                                                                                  | -2,948.99 | -1,075.88 | -1,572.78 | -5,298.24 | SE | 65.07 | -40.2  |
| Academy Gletsjer                                                                         | -4,421.99 | -1,273.41 | -1,391.29 | -5,137.44 | NO | 81.57 | -32.25 |
| GrÃvulv                                                                                 | -3,702.81 | -626.95   | -473.18   | -4,690.43 | SE | 64.35 | -41.57 |
| Kakiffaat Sermiat ; Kakivfait Sermiat                                                    | -3,005.84 | -303.55   | -4,225.33 | -4,646.63 | NW | 73.48 | -55.3  |
| Paakitsup Hermerrianga ; Paakitsup Sermersua ; Pituffik Gletsjer                         | -1,395.53 | -1,161.96 | -2,953.41 | -4,644.07 | NW | 76.28 | -68.59 |
| Sermeq Avannarleq                                                                        | -4,275.07 | 1,526.06  | -5,728.80 | -4,552.86 | NW | 73.94 | -55.77 |
| Kangerlussuaq Gletsjer                                                                   | -4,331.99 | -3,458.85 | -7,492.08 | -4,355.41 | CE | 68.67 | -33.08 |
| Courtauld Gletsjer                                                                       | -3,835.71 | -165.04   | -452.07   | -4,296.75 | CE | 68.6  | -32.02 |
| Neqip Illuata Sermia ; Arfalluarfiup Sermia ; Arfagdluarfiup Sermia ; Diebitsch Gletsjer | -2,256.69 | 267.44    | -1,958.08 | -4,027.65 | NW | 77.95 | -71.59 |
| Perlerfiup Sermia ; Perdlerfiup Sermia                                                   | -974.47   | -197.03   | -3,017.86 | -4,022.63 | CW | 70.99 | -50.92 |
| Bartholin Bræ                                                                            | 56.02     | -1,823.32 | -1,996.60 | -3,944.82 | CE | 69.66 | -24.13 |
| Qeqertarsuup Sermia                                                                      | -2,440.84 | -183.32   | -1,826.52 | -3,893.02 | NW | 73.59 | -55.53 |
| Paarnarsuit Sermiat ; Hart Gletsjer                                                      | -1,232.89 | -1,007.04 | -1,637.32 | -3,829.96 | NW | 77.7  | -67.18 |
| Kangerluarsuup Sermia ; Yngvar Nielsen Gletsjer                                          | -1,957.39 | -662.21   | -1,347.63 | -3,736.98 | CW | 71.25 | -51.47 |
|                                                                                          | -924.27   | -2,983.83 | -2,678.54 | -3,490.72 | NW | 76.33 | -64.08 |
| Kangilerngata Sermia ; Sermeq Av ; Kangilernata Sermia                                   | -287.97   | -170.15   | -2,870.47 | -3,309.47 | CW | 69.9  | -50.34 |
| Sermeq Avannarleq ; Sermeq Avangnardleq                                                  | -577.26   | -158.56   | -2,621.80 | -3,292.02 | CW | 69.38 | -50.27 |
| Helland Gletsjer                                                                         | -595.05   | -397.33   | -2,062.87 | -3,055.26 | NW | 76.25 | -64.87 |
| Daugaard-Jensen Gletsjer                                                                 | -1,513.33 | 668.32    | -1,837.67 | -2,682.69 | CE | 71.75 | -29    |
| Quinnisut Sermiat ; Quinisut Sermiat ; Quinissut Sermiat ; Hubbard Gletsjer              | -1,184.39 | -615.2    | -991.07   | -2,643.45 | NW | 77.6  | -67.74 |
| Eqip Sermia                                                                              | -1,121.59 | -78.74    | -1,931.40 | -2,589.53 | CW | 69.81 | -50.19 |
| Illullip Sermia ; Igdlugdliup Sermia                                                     | -1,325.52 | -277.38   | -1,850.93 | -2,546.99 | NW | 74.42 | -55.97 |
| Styrtegletsjer                                                                           | -506.15   | -334.4    | -1,750.01 | -2,440.42 | CE | 68.69 | -32.37 |
| Døde Bræ                                                                                 | -1,581.76 | 185.6     | -1,016.83 | -2,436.39 | CE | 70.48 | -29.28 |
| Akullikassaap Sermia                                                                     | -945.63   | -607.41   | -952.96   | -2,394.24 | NW | 73.05 | -54.88 |
| Sermeq Avannarleq ; Sermeq Avangnardleq ; Lille Gletsjer                                 | -145.16   | -315.74   | -1,817.14 | -2,254.32 | CW | 70.55 | -50.49 |

|                                                                             |           |           |           |           |    |       |        |
|-----------------------------------------------------------------------------|-----------|-----------|-----------|-----------|----|-------|--------|
| Saqqarliup Sermia ;<br>Sarqardliup Sermia                                   | -534.01   | -388.34   | -1,317.71 | -2,240.05 | CW | 68.87 | -50.28 |
| Vestfjord Gletsjer                                                          | -333      | -2,166.69 | -124.1    | -2,213.63 | CE | 70.29 | -29.47 |
| Adams Gletsjer                                                              | -895.46   | -2,668.41 | 347.28    | -2,067.83 | NO | 82.2  | -39.96 |
| Alianaatsup Sermia ; Sermeq<br>Kujalleq ; Sermeq Kujatdleq                  | -868.79   | -1,157.61 | -326.24   | -2,064.32 | CW | 70    | -50.16 |
| Sermeq Kujalleq ; Sermeq<br>Kujatdleq ; Store Gletsjer                      | -2,136.03 | -116.64   | 538       | -1,926.80 | CW | 70.41 | -50.54 |
| Kangerluarsuup Sermia ;<br>Bowdoin Gletsjer                                 | -480.86   | 234.89    | -1,698.71 | -1,859.00 | NW | 77.69 | -68.58 |
| Alanngorsuup Sermia                                                         | -1,290.67 | -283.67   | -489.26   | -1,812.68 | NW | 73.17 | -55.05 |
| Apuseerajik ; Kangertsivala<br>Apusiiala Qeqqartserpaartaa                  | -982.17   | 27.73     | -796.75   | -1,787.12 | SE | 65.94 | -38.46 |
| Neqip Sermia ; Morris Jesup<br>Gletsjer                                     | -1,191.50 | 183.94    | -814.57   | -1,759.69 | NW | 77.91 | -71.08 |
| Kangilliup Sermia ; Kangigdliup<br>Sermia ; Rink Isbræ                      | -1,019.78 | -991.42   | -166.91   | -1,688.33 | CW | 71.77 | -51.5  |
| Kangerlussuup Sermia                                                        | -2,919.17 | 2,399.28  | 185.5     | -1,670.95 | CW | 71.46 | -51.31 |
| Bamse Gletsjer                                                              | -997.93   | -138.5    | -654.38   | -1,638.44 | NW | 78.02 | -72.17 |
| Pitoraaviup Sermia ;<br>Arfalluarfiup Sermia ; Clements<br>Markham Gletsjer | -902.71   | 290.82    | -1,018.86 | -1,542.37 | NW | 77.95 | -71.85 |
| Heinkel Gletsjer                                                            | -293.11   | -240.53   | -1,005.85 | -1,482.35 | NE | 75.16 | -22.83 |
| Kangertsivala Apusiia ; Heim<br>Gletsjer                                    | -931.11   | -307.38   | -770.76   | -1,465.50 | SE | 65.99 | -38.45 |
| Waltershausen Gletsjer                                                      | -249.4    | -302.85   | -1,125.28 | -1,367.92 | NE | 73.92 | -24.42 |
| Rolige Bræ                                                                  | -692.35   | -642.08   | 137.81    | -1,314.24 | CE | 70.53 | -28.9  |
| Marie Sophie Gletsjer                                                       | -1,233.16 | 268.96    | -647.98   | -1,288.02 | NO | 81.78 | -34.5  |
| Ikissuup Sermersua ; Cornell<br>Gletsjer                                    | -598.09   | -392.14   | -876.5    | -1,280.70 | NW | 74.23 | -55.83 |
| Sermeq Kujalleq ; Sermeq<br>Kujatdleq                                       | 385.87    | -590.21   | -1,285.95 | -1,248.09 | SE | 60.12 | -43.37 |
| Nunatakletsjer                                                              | -201.26   | -148.62   | -980.58   | -1,213.63 | NE | 73.95 | -25.93 |
| Nigerlikasik Bræ                                                            | -613.61   | 347.34    | -905.06   | -1,171.33 | SW | 62.08 | -48.77 |
| Soranerbræen                                                                | -331.13   | 108.46    | -886.23   | -1,080.73 | NE | 76.17 | -21.92 |
| Uukkaasorsuaq ; Sermilik Bræ                                                | -2,053.63 | 676.04    | 152.88    | -1,043.93 | SW | 61.97 | -48.63 |
| Alanngorliup Sermia                                                         | -453.93   | -186.35   | -599.52   | -1,009.10 | CW | 68.92 | -50.2  |
| Nordfjord Gletsjer                                                          | -523.54   | -105.71   | -301.58   | -945.49   | CE | 68.72 | -32.65 |
| Dodge Gletsjer                                                              | 4.89      | -213.22   | -932.11   | -942.54   | NO | 78.18 | -72.68 |

|                                                                  |           |         |         |         |    |       |        |
|------------------------------------------------------------------|-----------|---------|---------|---------|----|-------|--------|
| Sermeq Kujalleq                                                  | -339.34   | -139.16 | -525.21 | -920.7  | NW | 73.83 | -55.58 |
| Sermiligaarsuup Sermia ;<br>Sermiligaarsuk Bræ                   | -1,115.70 | 415.8   | 313.96  | -853.98 | SW | 61.64 | -48.14 |
| Puisertoq                                                        | -228.33   | -67.48  | -426.79 | -669.34 | SE | 64.4  | -40.66 |
| Jættegletsjer                                                    | -89.19    | -198.36 | -512.41 | -651.3  | NE | 73.43 | -27.87 |
| Jomfruen                                                         | -211.57   | -157.37 | -384.8  | -650.3  | SE | 63.61 | -41.75 |
| Sermikasik Kujalleq ;<br>Sermikasik Kujatdleq                    | -196.91   | -128.14 | -196.66 | -611.65 | SE | 60.16 | -43.7  |
| Siorapaluup Qinngua ;<br>Qinnguata Sermia ; Verhoeff<br>Gletsjer | -234.24   | 271.86  | -455.47 | -525.18 | NW | 77.88 | -69.85 |
| Sermeq Avannarleq ; Sermeq<br>Avangnardleq                       | -274.47   | -168.79 | -177.56 | -430.13 | CW | 70.09 | -50.25 |
| Nordenskiold Gletsjer                                            | -123.49   | -252.99 | -218.63 | -416.34 | NE | 73.13 | -27.88 |
| Avannarleq Bræ                                                   | -366.94   | 160.37  | 64.5    | -368.69 | SW | 62.22 | -48.97 |
| Ydun Gletsjer                                                    | -250.88   | 34.6    | -151.65 | -306.57 | SE | 63.72 | -40.98 |
| Sermeq                                                           | -1,113.98 | 945.78  | -334.07 | -294.21 | SW | 63.56 | -50.4  |
| Sermilik ; Sermilik Isbræ                                        | -181.66   | -187.7  | -41.32  | -288.82 | CW | 70.63 | -50.62 |
| Heimdal Gletsjer                                                 | -775.5    | 380.56  | 271.17  | -260.25 | SE | 62.91 | -42.69 |
| Nunatakassaap Sermia ;<br>Naajarsuit Sermiat                     | -286.02   | -329.25 | 137.91  | -250.04 | NW | 73.25 | -55.08 |
| Eqalorutsit Kangilliit Sermiat                                   | -1,329.80 | 900.09  | 257.57  | -175.53 | SW | 61.38 | -45.73 |
